# Supplementary material for: Antidiabetic and antioxidant activities: Is there any link between them?
Source: Royal Society of Chemistry journal article supplement (doi:10.1039/c9nj01251f), 2019-01-01
Supplement: c9nj01251f1.pdf [file c9nj01251f1.pdf]

## SUPPORTING INFORMATION

### Antidiabetic and antioxidant activities: Is there any link between them?

Samson O. FAMUYIWA<sup>a</sup>, Kayode SANUSI<sup>a,\*</sup>, Kolade O. FALOYE<sup>a</sup>, Yusuf YILMAZ<sup>b</sup>,  
Ümit CEYLAN<sup>c</sup>

<sup>a</sup>Department of Chemistry, Obafemi Awolowo University, Ile-Ife, Nigeria

<sup>b</sup>NT Vocational School, Gaziantep University, 27310 Gaziantep, Turkey

<sup>c</sup>Department of Medical Services and Techniques, Vocational High School Health Services,  
Giresun University, 28100 Giresun, Turkey

\*Corresponding Authors' e-mail: [sosanusi@oauife.edu.ng](mailto:sosanusi@oauife.edu.ng)

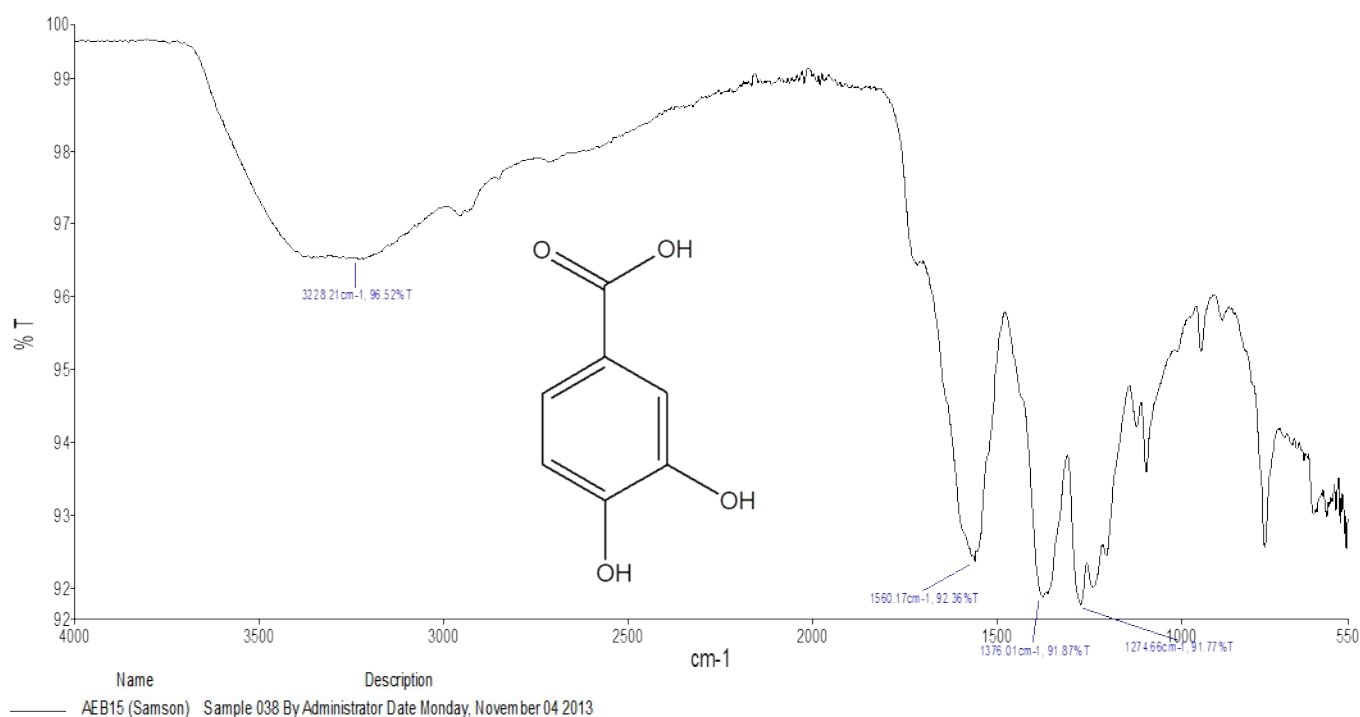

Figure S1: Experimental IR spectrum of the isolated PcA

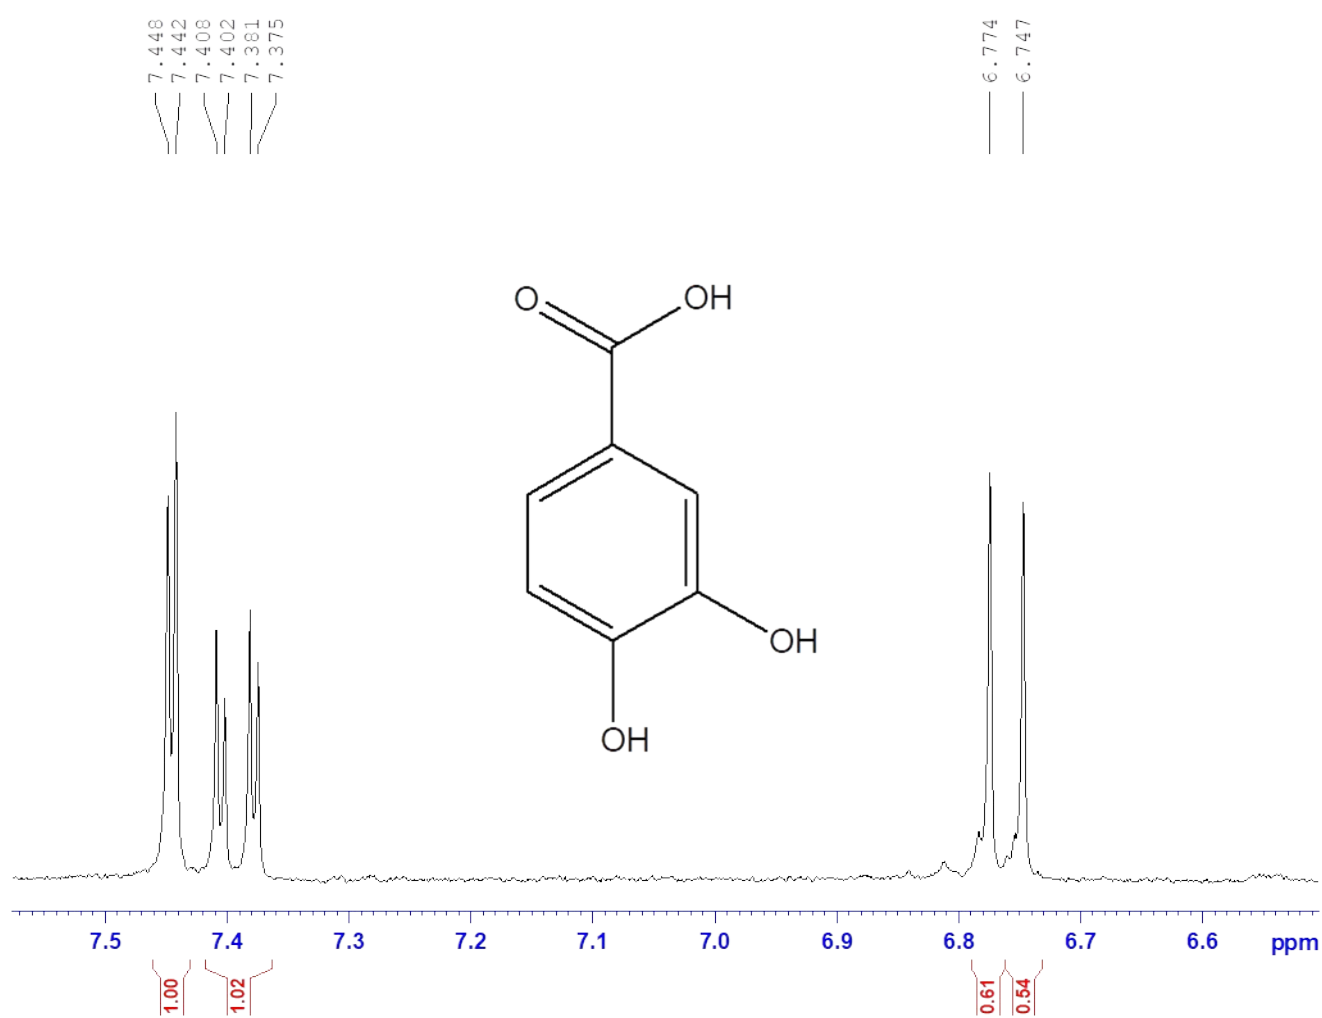

Figure S2: Experimental  $^1\text{H}$  NMR spectrum of the isolated PcA

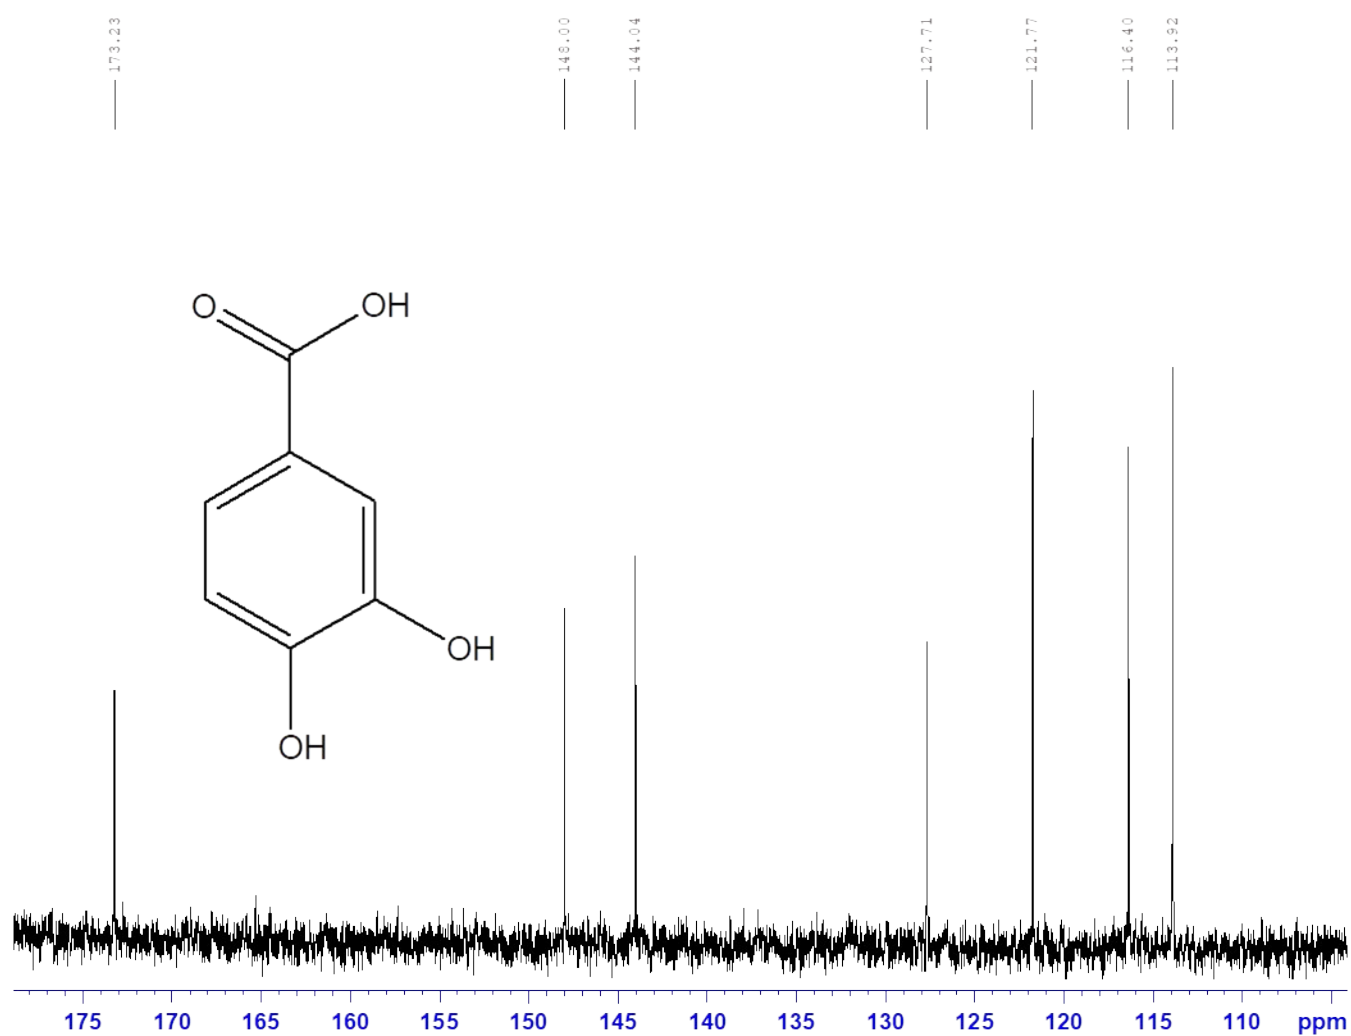

Figure S3: Experimental  $^{13}\text{C}$  NMR spectrum of the isolated PcA

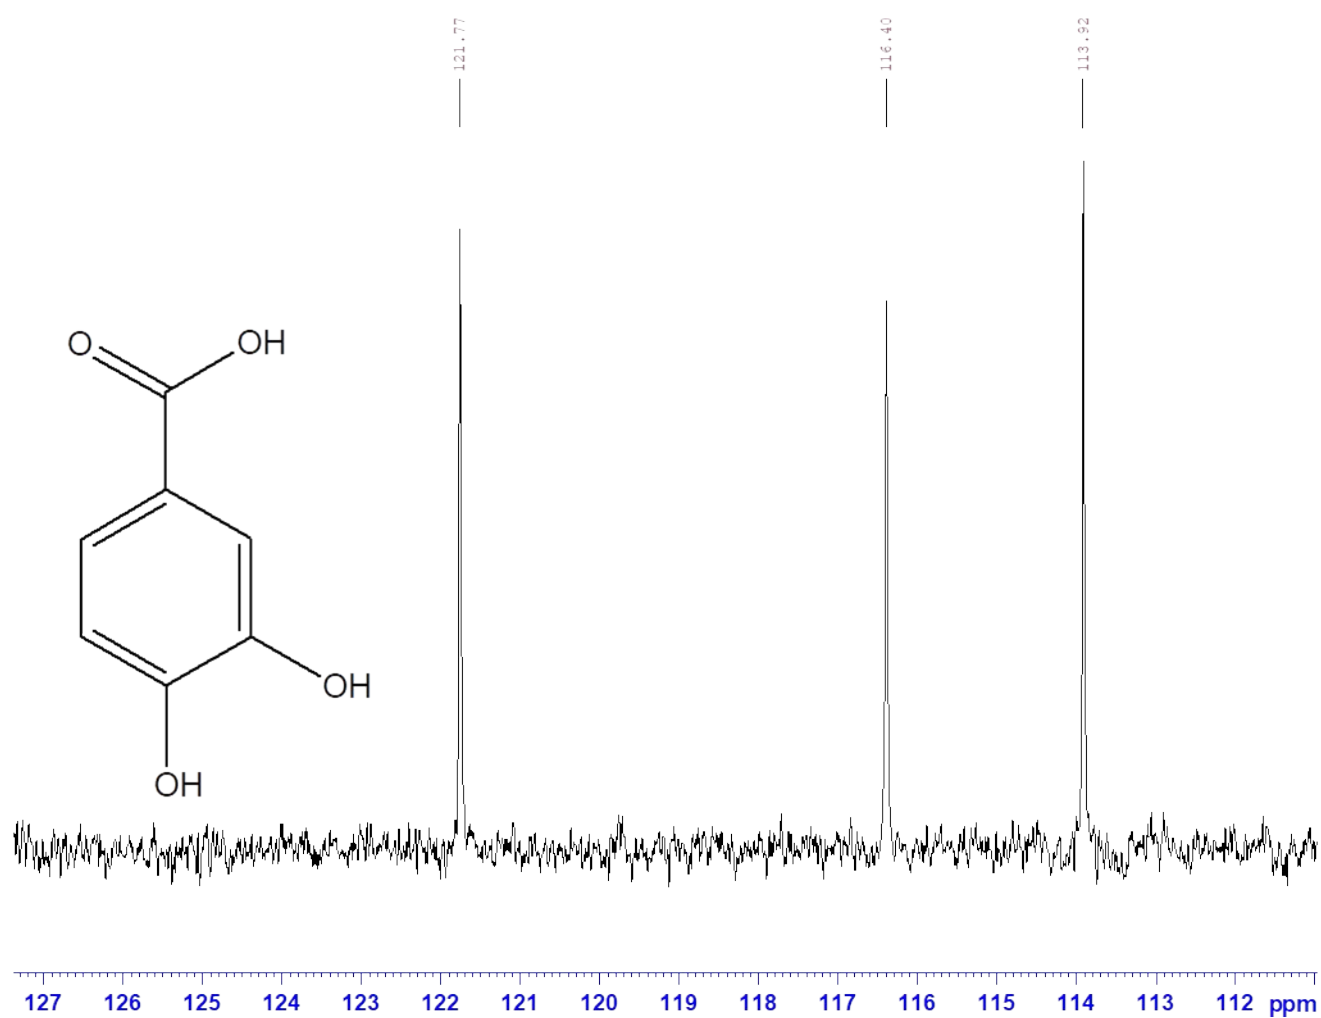

Figure S4: DEPT-135 NMR spectrum of the isolated PcA

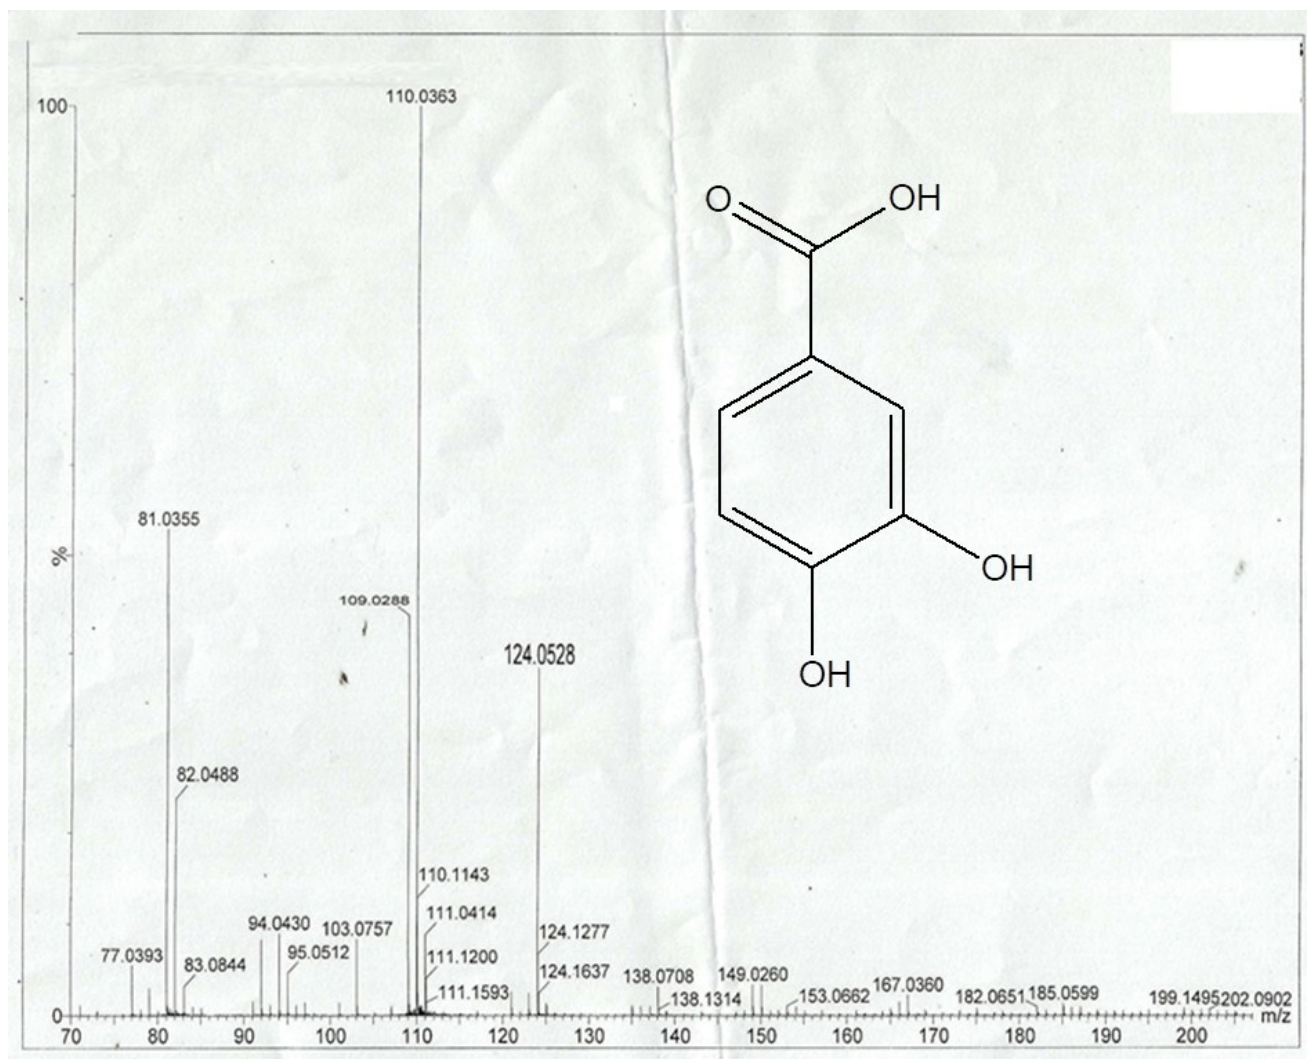

Figure S5: Mass spectrum of the isolated PcA

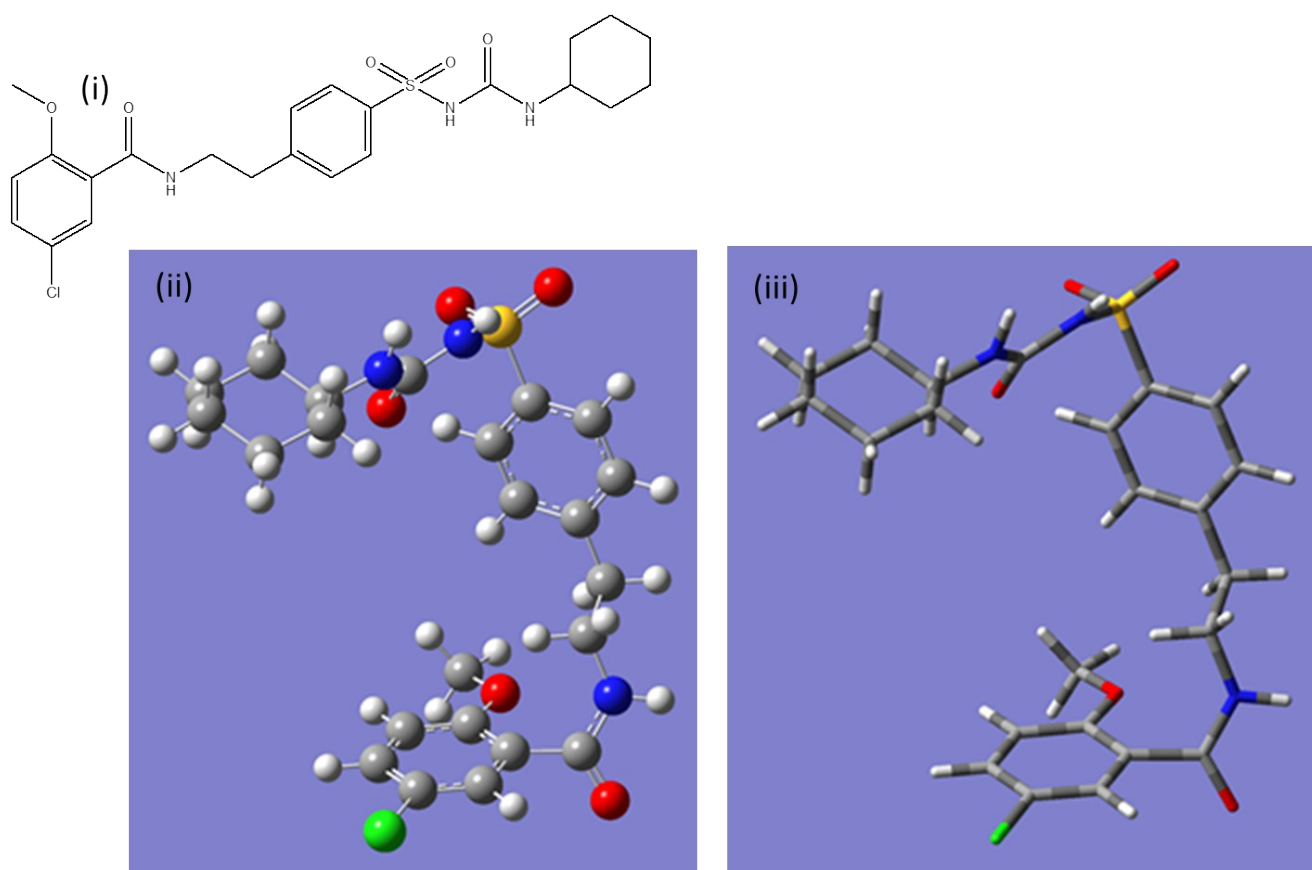

Figure S6: Glibenclamide structures (i) 2-D structural formula (ii) 3-D optimized structure in ball & bond type view and (iii) 3-D optimized structure in tube view. Images (ii) & (iii) attest to the non-planar structure of GcD.

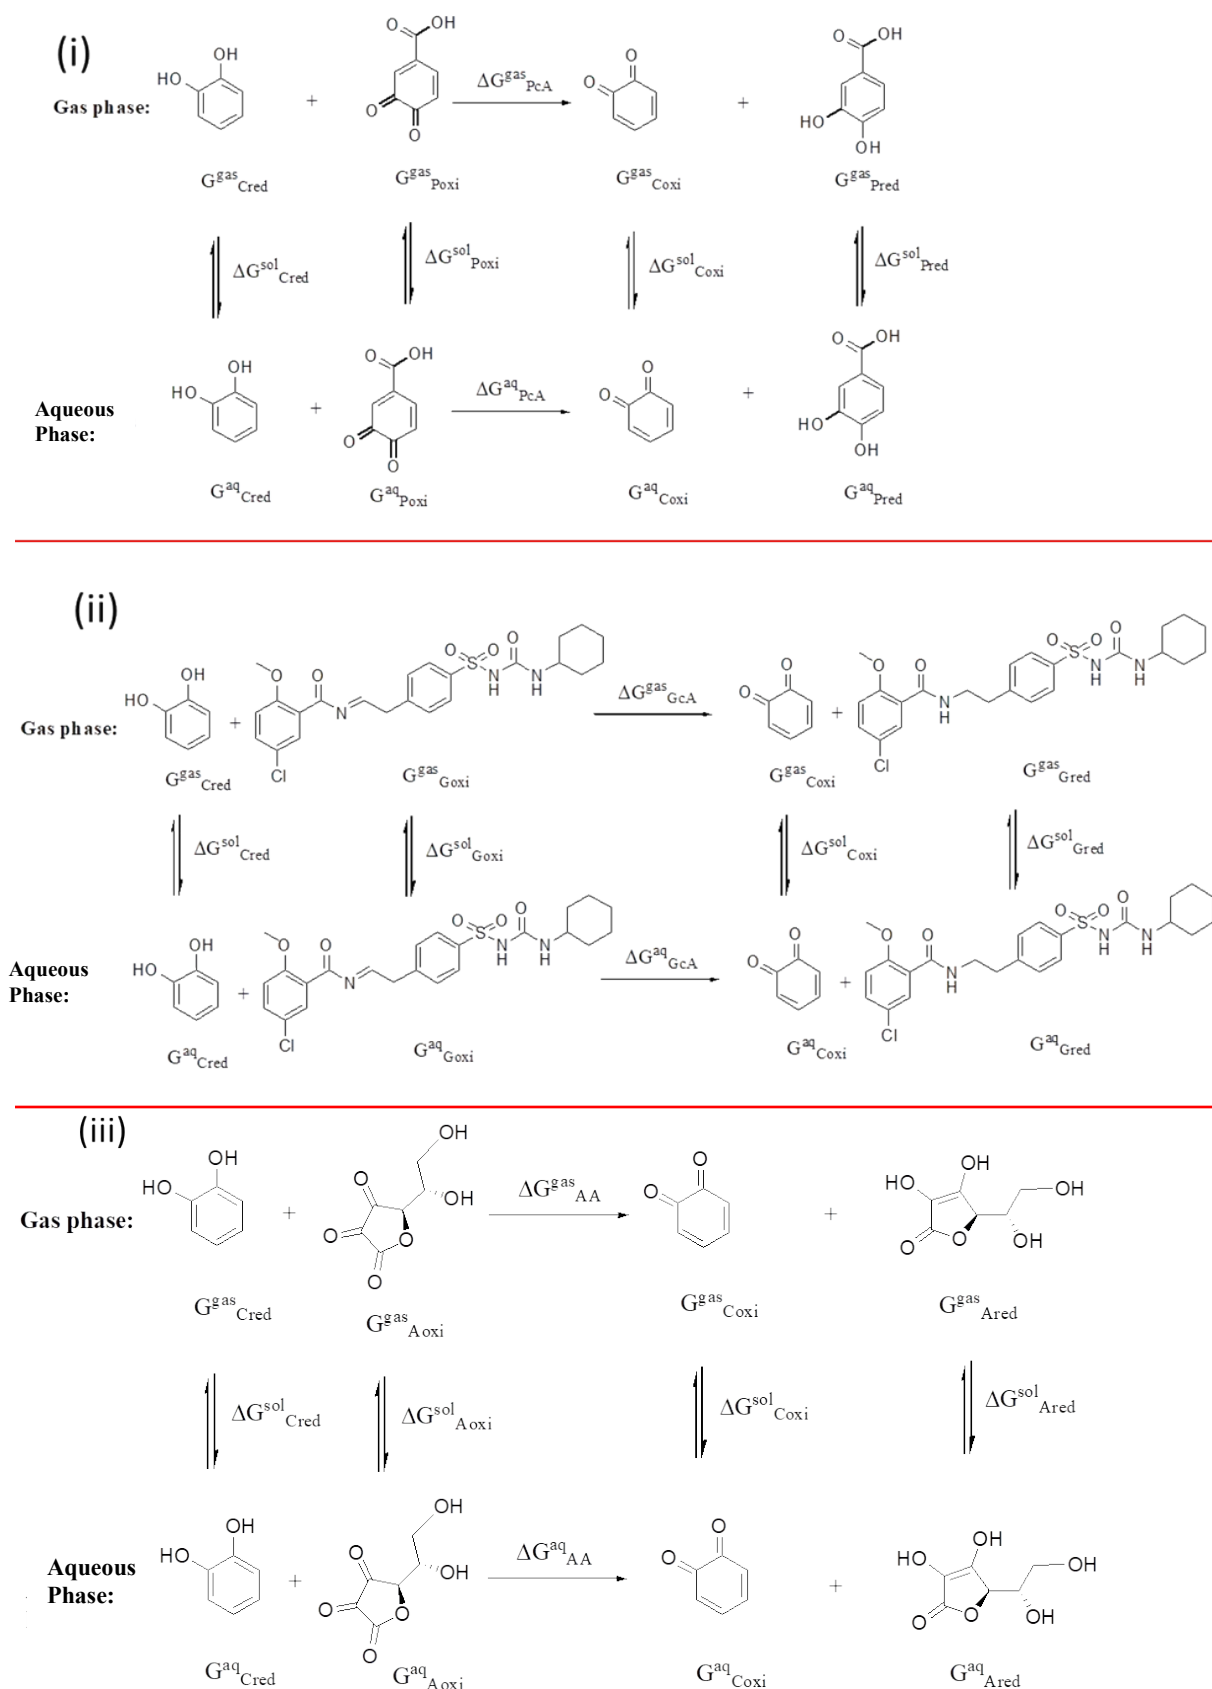

Figure S7: Isodesmic reaction cycles employed for the calculation of the solution and gas phase free-energy changes. (i) For the protocatechuic acid, (ii) for the glibenclamide and (iii) for the ascorbic acid.

Table S1: Antidiabetic activity of PcA on streptozotocin-induced diabetic rats

| Dose of compound<br>(mg/Kg)    | Blood glucose level as percentage of To (reduction in blood glucose relative to<br>negative control at Tt) |                        |                        |                        |                        |
|--------------------------------|------------------------------------------------------------------------------------------------------------|------------------------|------------------------|------------------------|------------------------|
|                                | Day 1                                                                                                      | Day 4                  | Day 7                  | Day 10                 | Day 14                 |
| Negative control               | 100                                                                                                        | 110.83 ± 2.45          | 107.04 ± 0.03          | 106.21 ± 1.32          | 102.23 ± 2.12          |
| PcA (20)                       | 100                                                                                                        | 20.33 ± 2.68<br>(81.7) | 16.74 ± 1.57<br>(84.4) | 15.21 ± 1.90<br>(85.7) | 12.99 ± 2.34<br>(87.3) |
| GcD (5)                        | 100                                                                                                        | 17.62 ± 2.14<br>(84.1) | 15.97 ± 1.48<br>(85.1) | 14.68 ± 1.44<br>(86.2) | 12.55 ± 1.34<br>(87.7) |
| Normal rats (positive control) | 100                                                                                                        | 12.14 ± 0.98<br>(89.2) | 11.56 ± 1.21<br>(89.3) | 10.98 ± 0.24<br>(89.7) | 10.21 ± 2.11<br>(90.0) |

Data show the mean ± SEM blood glucose levels at the different time interval expressed as percentages of levels at 0 h (T<sub>0</sub>), n=6. Values in parentheses represent the percentage reductions in blood glucose levels relative to negative control for each time point. Values with different superscripts within columns are significantly different (p < 0.05, one way analysis of variance followed by Student-Newman-Keuls test). GcD: positive control, PcA: test compound.
